# Supplementary material for: Agronomic Assessment of Fibrous Flax and Linseed Advanced Breeding Lines as Potential New Varieties
Source: MDPI journal article supplement (doi:10.3390/agronomy11101917), 2021-09-24
Supplement: s1 [file s1]

## Statistical data

Comparative analyzes were performed using one-way analysis of variance (ANOVA). In the case of failure to meet the assumption of homogeneity of variance (verified with Levene's test), the Welch F test was used. Tukey's RIR test was used for multiple comparisons. The results were considered statistically significant when the calculated test probability met the inequality  $p \leq 0.05$ . The calculations were made in the Statistica 10.0 package by Statsoft Polska.

### I. Fibre flax trials

Table S1. Post-hoc test for total length of the reference fiber flax varieties and HDH line in vegetation period 2019.

| Varieties | Evea  | Filea | Novea | HDH   | Jan   | Sara  | Modran | Selena |
|-----------|-------|-------|-------|-------|-------|-------|--------|--------|
| Evea      |       | 1,000 | 0,001 | 0,000 | 1,000 | 0,067 | 0,000  | 0,000  |
| Filea     | 1,000 |       | 0,000 | 0,000 | 0,975 | 0,011 | 0,000  | 0,000  |
| Novea     | 0,001 | 0,000 |       | 0,665 | 0,012 | 0,977 | 0,998  | 0,826  |
| HDH       | 0,000 | 0,000 | 0,665 |       | 0,000 | 0,086 | 0,981  | 1,000  |
| Jan       | 1,000 | 0,975 | 0,012 | 0,000 |       | 0,251 | 0,001  | 0,000  |
| Sara      | 0,067 | 0,011 | 0,977 | 0,086 | 0,251 |       | 0,643  | 0,170  |
| Modran    | 0,000 | 0,000 | 0,998 | 0,981 | 0,001 | 0,643 |        | 0,997  |
| Selena    | 0,000 | 0,000 | 0,826 | 1,000 | 0,000 | 0,170 | 0,997  |        |

F = 16,59

P = 0,00

Table S2. Post-hoc test for total length of the reference fiber flax varieties and HDH line in vegetation period 2020.

| Varieties | Evea  | Filea | Novea | HDH   | Jan   | Sara  | Modran | Selena |
|-----------|-------|-------|-------|-------|-------|-------|--------|--------|
| Evea      | --    | 0,000 | 0,000 | 0,000 | 0,052 | 0,605 | 0,000  | 0,000  |
| Filea     | 0,000 | --    | 0,743 | 0,004 | 0,873 | 0,170 | 0,838  | 0,023  |
| Novea     | 0,000 | 0,743 | --    | 0,374 | 0,058 | 0,001 | 1,000  | 0,707  |
| HDH       | 0,000 | 0,004 | 0,374 | --    | 0,000 | 0,000 | 0,275  | 1,000  |
| Jan       | 0,052 | 0,873 | 0,058 | 0,000 | --    | 0,933 | 0,093  | 0,000  |
| Sara      | 0,605 | 0,170 | 0,001 | 0,000 | 0,933 | --    | 0,002  | 0,000  |
| Modran    | 0,000 | 0,838 | 1,000 | 0,275 | 0,093 | 0,002 | --     | 0,592  |
| Selena    | 0,000 | 0,023 | 0,707 | 1,000 | 0,000 | 0,000 | 0,592  | --     |

F = 14,52

P = 0,00

Table S3. Post-hoc test for technical length of the reference fiber flax varieties and HDH line in vegetation period 2019.

| Varieties | Evea  | Filea | Novea | HDH   | Jan   | Sara  | Modran | Selena |
|-----------|-------|-------|-------|-------|-------|-------|--------|--------|
| Evea      |       | 1,000 | 0,000 | 0,000 | 0,399 | 0,000 | 0,000  | 0,000  |
| Filea     | 1,000 |       | 0,000 | 0,000 | 0,107 | 0,000 | 0,000  | 0,000  |
| Novea     | 0,000 | 0,000 |       | 0,002 | 0,000 | 0,692 | 0,999  | 0,273  |
| HDH       | 0,000 | 0,000 | 0,002 |       | 0,000 | 0,000 | 0,025  | 0,843  |
| Jan       | 0,399 | 0,107 | 0,000 | 0,000 |       | 0,146 | 0,000  | 0,000  |
| Sara      | 0,000 | 0,000 | 0,692 | 0,000 | 0,146 |       | 0,271  | 0,001  |
| Modran    | 0,000 | 0,000 | 0,999 | 0,025 | 0,000 | 0,271 |        | 0,692  |
| Selena    | 0,000 | 0,000 | 0,273 | 0,843 | 0,000 | 0,001 | 0,692  |        |

F = 35,97

P = 0,00

Table S4. Post-hoc test for technical length of the reference fiber flax varieties and HDH line in vegetation period 2020.

| Varieties | Evea  | Filea | Novea | HDH   | Jan   | Sara  | Modran | Selena |
|-----------|-------|-------|-------|-------|-------|-------|--------|--------|
| Evea      | --    | 0,007 | 0,000 | 0,000 | 0,000 | 0,261 | 0,000  | 0,000  |
| Filea     | 0,007 | --    | 0,129 | 0,000 | 0,978 | 0,915 | 0,512  | 0,000  |
| Novea     | 0,000 | 0,129 | --    | 0,066 | 0,687 | 0,002 | 0,996  | 0,129  |
| HDH       | 0,000 | 0,000 | 0,066 | --    | 0,000 | 0,000 | 0,006  | 1,000  |
| Jan       | 0,000 | 0,978 | 0,687 | 0,000 | --    | 0,332 | 0,978  | 0,000  |
| Sara      | 0,261 | 0,915 | 0,002 | 0,000 | 0,332 | --    | 0,029  | 0,000  |
| Modran    | 0,000 | 0,512 | 0,996 | 0,006 | 0,978 | 0,029 | --     | 0,015  |
| Selena    | 0,000 | 0,000 | 0,129 | 1,000 | 0,000 | 0,000 | 0,015  | --     |

F = 16,3

P = 0,00

Table S5. Post-hoc test for panicle length of the reference fiber flax varieties and HDH line in vegetation period 2019.

| Varieties | Evea  | Filea | Novea | HDH   | Jan   | Sara  | Modran | Selena |
|-----------|-------|-------|-------|-------|-------|-------|--------|--------|
| Evea      |       | 1     | 0,056 | 0,000 | 0,284 | 0,380 | 0,150  | 0,002  |
| Filea     | 1,000 |       | 0,060 | 0,000 | 0,299 | 0,397 | 0,160  | 0,002  |
| Novea     | 0,056 | 0,060 |       | 0,108 | 0,999 | 0,996 | 1,000  | 0,989  |
| HDH       | 0,000 | 0,000 | 0,108 |       | 0,014 | 0,008 | 0,037  | 0,644  |
| Jan       | 0,284 | 0,299 | 0,999 | 0,014 |       | 1     | 1,000  | 0,791  |
| Sara      | 0,380 | 0,397 | 0,996 | 0,008 | 1     |       | 1,000  | 0,693  |
| Modran    | 0,150 | 0,160 | 1,000 | 0,037 | 1,000 | 1,000 |        | 0,922  |
| Selena    | 0,002 | 0,002 | 0,989 | 0,644 | 0,791 | 0,693 | 0,922  |        |

F = 6,65

P = 0,00

Table S6. Post-hoc test for panicle length of the reference fiber flax varieties and HDH line in vegetation period 2020.

| Varieties | Evea  | Filea | Novea | HDH   | Jan   | Sara  | Modran | Selena |
|-----------|-------|-------|-------|-------|-------|-------|--------|--------|
| Evea      | --    | 0,073 | 0,981 | 1     | 0,120 | 0,997 | 0,390  | 0,990  |
| Filea     | 0,073 | --    | 0,518 | 0,042 | 0,000 | 0,007 | 0,995  | 0,004  |
| Novea     | 0,981 | 0,518 | --    | 0,948 | 0,006 | 0,712 | 0,936  | 0,617  |
| HDH       | 1     | 0,042 | 0,948 | --    | 0,188 | 1     | 0,278  | 0,998  |
| Jan       | 0,120 | 0,000 | 0,006 | 0,188 | --    | 0,485 | 0,000  | 0,584  |
| Sara      | 0,997 | 0,007 | 0,712 | 1     | 0,485 | --    | 0,083  | 1      |
| Modran    | 0,390 | 0,995 | 0,936 | 0,278 | 0,000 | 0,083 | --     | 0,056  |
| Selena    | 0,990 | 0,004 | 0,617 | 0,998 | 0,584 | 1     | 0,056  | --     |

F = 6,34

P = 0,00

Table S7. Post-hoc test for stem diameter of the reference fiber flax varieties and HDH line in vegetation period 2019.

| Varieties | Evea  | Filea | Novea | HDH   | Jan   | Sara  | Modran | Selena |
|-----------|-------|-------|-------|-------|-------|-------|--------|--------|
| Evea      |       | 1     | 0,280 | 1,000 | 0,724 | 0,996 | 0,974  | 1      |
| Filea     | 1     |       | 0,426 | 0,999 | 0,563 | 1,000 | 0,995  | 1      |
| Novea     | 0,280 | 0,426 |       | 0,115 | 0,001 | 0,817 | 0,931  | 0,426  |
| HDH       | 1,000 | 0,999 | 0,115 |       | 0,919 | 0,952 | 0,856  | 0,999  |
| Jan       | 0,724 | 0,563 | 0,001 | 0,919 |       | 0,202 | 0,104  | 0,563  |
| Sara      | 0,996 | 1,000 | 0,817 | 0,952 | 0,202 |       | 1,000  | 1,000  |
| Modran    | 0,974 | 0,995 | 0,931 | 0,856 | 0,104 | 1,000 |        | 0,995  |
| Selena    | 1     | 1     | 0,426 | 0,999 | 0,563 | 1,000 | 0,995  |        |

F = 2,78

P = 0,006

Table S8. Post-hoc test for stem diameter of the reference fiber flax varieties and HDH line in vegetation period 2020.

| Varieties | Evea  | Filea | Novea | HDH   | Jan   | Sara  | Modran | Selena |
|-----------|-------|-------|-------|-------|-------|-------|--------|--------|
| Evea      | --    | 0,003 | 0,909 | 0,000 | 0,999 | 1     | 0,739  | 0,117  |
| Filea     | 0,003 | --    | 0,177 | 0,993 | 0,026 | 0,000 | 0,353  | 0,957  |
| Novea     | 0,909 | 0,177 | --    | 0,018 | 0,997 | 0,625 | 1      | 0,836  |
| HDH       | 0,000 | 0,993 | 0,018 | --    | 0,001 | 0,000 | 0,053  | 0,545  |
| Jan       | 0,999 | 0,026 | 0,997 | 0,001 | --    | 0,957 | 0,968  | 0,389  |
| Sara      | 1     | 0,000 | 0,625 | 0,000 | 0,957 | --    | 0,389  | 0,026  |
| Modran    | 0,739 | 0,353 | 1     | 0,053 | 0,968 | 0,389 | --     | 0,957  |
| Selena    | 0,117 | 0,957 | 0,836 | 0,545 | 0,389 | 0,026 | 0,957  | --     |

F = 5,89

P = 0,00

Table S9. Welch test for total yield of the reference fiber flax varieties and HDH line in vegetation period 2019.

| Varieties | Mean | N | Standard deviation | Min. | Max. | F Welch | p     |
|-----------|------|---|--------------------|------|------|---------|-------|
| Evea      | 5,67 | 3 | 0,81               | 4,8  | 6,4  | 0,47    | 0,858 |
| Filea     | 5,37 | 3 | 0,40               | 5,0  | 5,8  |         |       |
| Novea     | 5,27 | 3 | 0,29               | 5,1  | 5,6  |         |       |
| HDH       | 5,73 | 3 | 0,50               | 5,2  | 6,2  |         |       |
| Jan       | 5,90 | 3 | 1,18               | 4,6  | 6,9  |         |       |
| Sara      | 5,97 | 3 | 0,40               | 5,6  | 6,4  |         |       |
| Modran    | 5,83 | 3 | 0,45               | 5,4  | 6,3  |         |       |
| Selena    | 5,97 | 3 | 0,78               | 5,1  | 6,6  |         |       |

The collected data do not allow to conclude that the compared varieties differ in average total yield.

Table S10. Post-hoc test for total yield of the reference fiber flax varieties and HDH line in vegetation period 2020.

| Varieties | Evea  | Filea | Novea | HDH   | Jan   | Sara  | Modran | Selena |
|-----------|-------|-------|-------|-------|-------|-------|--------|--------|
| Evea      | --    | 0,772 | 0,999 | 0,009 | 1     | 0,997 | 1      | 0,600  |
| Filea     | 0,772 | --    | 0,974 | 0,161 | 0,518 | 0,984 | 0,518  | 1      |
| Novea     | 0,999 | 0,974 | --    | 0,028 | 0,963 | 1     | 0,963  | 0,901  |
| HDH       | 0,009 | 0,161 | 0,028 | --    | 0,004 | 0,033 | 0,004  | 0,259  |
| Jan       | 1     | 0,518 | 0,963 | 0,004 | --    | 0,946 | 1      | 0,356  |
| Sara      | 0,997 | 0,984 | 1     | 0,033 | 0,946 | --    | 0,946  | 0,927  |
| Modran    | 1     | 0,518 | 0,963 | 0,004 | 1     | 0,946 | --     | 0,356  |
| Selena    | 0,600 | 1     | 0,901 | 0,259 | 0,356 | 0,927 | 0,356  | --     |

F = 5,06

P = 0,003

Table S11. Welch test for straw yield of the reference fiber flax varieties and HDH line in vegetation period 2019.

| Varieties | Mean | N | Standard deviation | Min. | Max. | F Welch | p     |
|-----------|------|---|--------------------|------|------|---------|-------|
| Evea      | 4,00 | 3 | 0,62               | 3,30 | 4,50 | 0,51    | 0,836 |
| Filea     | 3,67 | 3 | 0,25               | 3,40 | 3,90 |         |       |
| Novea     | 3,73 | 3 | 0,23               | 3,60 | 4,00 |         |       |
| HDH       | 3,80 | 3 | 0,20               | 3,60 | 4,00 |         |       |
| Jan       | 3,87 | 3 | 0,67               | 3,10 | 4,30 |         |       |
| Sara      | 4,07 | 3 | 0,29               | 3,90 | 4,40 |         |       |
| Modran    | 4,10 | 3 | 0,26               | 3,90 | 4,40 |         |       |
| Selena    | 4,07 | 3 | 0,51               | 3,50 | 4,50 |         |       |

The collected data do not allow to conclude that the compared varieties differ in average straw yield.

Table S12. Welch test for straw yield of the reference fiber flax varieties and HDH line in vegetation period 2020.

| Varieties | Mean  | N | Standard deviation | Min.  | Max.  | F Welch | p     |
|-----------|-------|---|--------------------|-------|-------|---------|-------|
| Evea      | 82,60 | 3 | 2,60               | 80,00 | 85,20 | 1,70    | 0,181 |
| Filea     | 85,17 | 3 | 2,95               | 82,20 | 88,10 |         |       |
| Novea     | 83,43 | 3 | 3,07               | 80,00 | 85,90 |         |       |
| HDH       | 92,60 | 3 | 5,16               | 86,70 | 96,30 |         |       |
| Jan       | 80,27 | 3 | 2,14               | 77,80 | 81,50 |         |       |
| Sara      | 85,20 | 3 | 8,90               | 76,30 | 94,10 |         |       |
| Modran    | 81,00 | 3 | 8,43               | 74,10 | 90,40 |         |       |
| Selena    | 82,97 | 3 | 1,27               | 81,50 | 83,70 |         |       |

The collected data do not allow to conclude that the compared varieties differ in average straw yield.

Table S13. Welch test for seed yield of the reference fiber flax varieties and HDH line in vegetation period 2019.

| Varieties | Mean | N | Standard deviation | Min. | Max. | F Welch | p     |
|-----------|------|---|--------------------|------|------|---------|-------|
| Evea      | 0,47 | 3 | 0,11               | 0,36 | 0,58 | 1,29    | 0,309 |
| Filea     | 0,45 | 3 | 0,06               | 0,42 | 0,52 |         |       |
| Novea     | 0,40 | 3 | 0,05               | 0,34 | 0,43 |         |       |
| HDH       | 0,56 | 3 | 0,07               | 0,48 | 0,60 |         |       |
| Jan       | 0,47 | 3 | 0,22               | 0,25 | 0,68 |         |       |
| Sara      | 0,48 | 3 | 0,16               | 0,30 | 0,60 |         |       |
| Modran    | 0,46 | 3 | 0,12               | 0,32 | 0,55 |         |       |
| Selena    | 0,67 | 3 | 0,14               | 0,50 | 0,76 |         |       |

The collected data do not allow to conclude that the compared varieties differ in average seed yield.

Table S14. Welch test for seed yield of the reference fiber flax varieties and HDH line in vegetation period 2020.

| Varieties | Mean | N | Standard deviation | Min. | Max. | F Welch | p     |
|-----------|------|---|--------------------|------|------|---------|-------|
| Evea      | 4,03 | 3 | 0,25               | 3,80 | 4,30 | 1,24    | 0,337 |
| Filea     | 6,17 | 3 | 0,65               | 5,50 | 6,80 |         |       |
| Novea     | 4,97 | 3 | 2,03               | 3,60 | 7,30 |         |       |
| HDH       | 6,37 | 3 | 1,31               | 5,00 | 7,60 |         |       |
| Jan       | 5,50 | 3 | 2,10               | 3,40 | 7,60 |         |       |
| Sara      | 4,60 | 3 | 0,50               | 4,10 | 5,10 |         |       |
| Modran    | 4,37 | 3 | 1,45               | 2,70 | 5,30 |         |       |
| Selena    | 6,70 | 3 | 2,48               | 3,90 | 8,60 |         |       |

The collected data do not allow to conclude that the compared varieties differ in average seed yield.

## II. Linseed trials

Table S15. Post-hoc test for total length of the reference linseed varieties and R26 line in vegetation period 2019.

| Varieties | CJ 1016 | Altess | Festival | Marquise | Merlin | Jantarol | Bukoz | R26   |
|-----------|---------|--------|----------|----------|--------|----------|-------|-------|
| CJ 1016   |         | 1,000  | 0,000    | 1,000    | 0,001  | 0,000    | 0,000 | 0,000 |
| Altess    | 1,000   |        | 0,000    | 1,000    | 0,024  | 0,000    | 0,000 | 0,000 |
| Festival  | 0,000   | 0,000  |          | 0,000    | 0,000  | 0,000    | 1,000 | 0,998 |
| Marquise  | 1,000   | 1,000  | 0,000    |          | 0,013  | 0,000    | 0,000 | 0,000 |
| Merlin    | 0,001   | 0,024  | 0,000    | 0,013    |        | 0,006    | 0,000 | 0,000 |
| Jantarol  | 0,000   | 0,000  | 0,000    | 0,000    | 0,006  |          | 0,010 | 0,000 |
| Bukoz     | 0,000   | 0,000  | 1,000    | 0,000    | 0,000  | 0,010    |       | 0,782 |
| R26       | 0,000   | 0,000  | 0,998    | 0,000    | 0,000  | 0,000    | 0,782 |       |

F = 51,27

P = 0,00

Table S16. Post-hoc test for total length of the reference linseed varieties and R26 line in vegetation period 2020.

| Varieties | CJ 1016 | Altess | Festival | Marquise | Merlin | Jantarol | Bukoz | R26   |
|-----------|---------|--------|----------|----------|--------|----------|-------|-------|
| CJ 1016   | --      | 0,069  | 0,000    | 0,551    | 0,891  | 0,000    | 0,000 | 0,000 |
| Altess    | 0,069   | --     | 0,000    | 0,972    | 0,001  | 0,000    | 0,000 | 0,000 |
| Festival  | 0,000   | 0,000  | --       | 0,000    | 0,000  | 0,000    | 0,589 | 0,000 |
| Marquise  | 0,551   | 0,972  | 0,000    | --       | 0,028  | 0,000    | 0,000 | 0,000 |
| Merlin    | 0,891   | 0,001  | 0,000    | 0,028    | --     | 0,020    | 0,000 | 0,021 |
| Jantarol  | 0,000   | 0,000  | 0,000    | 0,000    | 0,020  | --       | 0,170 | 1     |
| Bukoz     | 0,000   | 0,000  | 0,589    | 0,000    | 0,000  | 0,170    | --    | 0,160 |
| R26       | 0,000   | 0,000  | 0,000    | 0,000    | 0,021  | 1        | 0,160 | --    |

F = 40,83

P = 0,00

Table S17. Post-hoc test for technical length of the reference linseed varieties and R26 line in vegetation period 2019.

| Varieties | CJ 1016 | Altess | Festival | Marquise | Merlin | Jantarol | Bukoz | R26   |
|-----------|---------|--------|----------|----------|--------|----------|-------|-------|
| CJ 1016   |         | 0,935  | 0,000    | 1,000    | 0,000  | 0,000    | 0,000 | 0,000 |
| Altess    | 0,935   |        | 0,000    | 0,997    | 0,000  | 0,000    | 0,000 | 0,000 |
| Festival  | 0,000   | 0,000  |          | 0,000    | 0,000  | 0,000    | 0,044 | 0,798 |
| Marquise  | 1,000   | 0,997  | 0,000    |          | 0,000  | 0,000    | 0,000 | 0,000 |
| Merlin    | 0,000   | 0,000  | 0,000    | 0,000    |        | 0,032    | 0,000 | 0,000 |
| Jantarol  | 0,000   | 0,000  | 0,000    | 0,000    | 0,032  |          | 0,903 | 0,089 |
| Bukoz     | 0,000   | 0,000  | 0,044    | 0,000    | 0,000  | 0,903    |       | 0,991 |
| R26       | 0,000   | 0,000  | 0,798    | 0,000    | 0,000  | 0,089    | 0,991 |       |

F = 47,40

P = 0,00

Table S18. Post-hoc test for technical length of the reference linseed varieties and R26 line in vegetation period 2020.

| Varieties | CJ 1016 | Altess | Festival | Marquise | Merlin | Jantarol | Bukoz | R26   |
|-----------|---------|--------|----------|----------|--------|----------|-------|-------|
| CJ 1016   | --      | 0,000  | 0,000    | 0,997    | 0,247  | 0,001    | 0,000 | 0,002 |
| Altess    | 0,000   | --     | 0,000    | 0,001    | 0,000  | 0,000    | 0,000 | 0,000 |
| Festival  | 0,000   | 0,000  | --       | 0,000    | 0,000  | 0,000    | 0,000 | 0,000 |
| Marquise  | 0,997   | 0,001  | 0,000    | --       | 0,040  | 0,000    | 0,000 | 0,000 |
| Merlin    | 0,247   | 0,000  | 0,000    | 0,040    | --     | 0,647    | 0,136 | 0,779 |
| Jantarol  | 0,001   | 0,000  | 0,000    | 0,000    | 0,647  | --       | 0,987 | 1     |
| Bukoz     | 0,000   | 0,000  | 0,000    | 0,000    | 0,136  | 0,987    | --    | 0,956 |
| R26       | 0,002   | 0,000  | 0,000    | 0,000    | 0,779  | 1        | 0,956 | --    |

F = 37,54

P = 0,00

Table S19. Post-hoc test for panicle length of the reference linseed varieties and R26 line in vegetation period 2019.

| Varieties | CJ 1016 | Altess | Festival | Marquise | Merlin | Jantarol | Bukoz | R26   |
|-----------|---------|--------|----------|----------|--------|----------|-------|-------|
| CJ 1016   |         | 1,000  | 1,000    | 1,000    | 0,910  | 1,000    | 0,156 | 0,002 |
| Altess    | 1,000   |        | 1,000    | 0,997    | 1,000  | 1,000    | 0,015 | 0,000 |
| Festival  | 1,000   | 1,000  |          | 1,000    | 0,873  | 1,000    | 0,195 | 0,003 |
| Marquise  | 1,000   | 0,997  | 1,000    |          | 0,580  | 1,000    | 0,477 | 0,015 |
| Merlin    | 0,910   | 1,000  | 0,873    | 0,580    |        | 0,985    | 0,000 | 0,000 |
| Jantarol  | 1,000   | 1,000  | 1,000    | 1,000    | 0,985  |          | 0,060 | 0,000 |
| Bukoz     | 0,156   | 0,015  | 0,195    | 0,477    | 0,000  | 0,060    |       | 0,996 |
| R26       | 0,002   | 0,000  | 0,003    | 0,015    | 0,000  | 0,000    | 0,996 |       |

F = 6,78

P = 0,00

Table S20. Post-hoc test for panicle length of the reference linseed varieties and R26 line in vegetation period 2020.

| Varieties | CJ 1016 | Altess | Festival | Marquise | Merlin | Jantarol | Bukoz | R26   |
|-----------|---------|--------|----------|----------|--------|----------|-------|-------|
| CJ 1016   | --      | 0,202  | 1        | 0,484    | 0,849  | 0,887    | 0,001 | 0,752 |
| Altess    | 0,202   | --     | 0,425    | 0,000    | 0,002  | 0,945    | 0,725 | 0,987 |
| Festival  | 1       | 0,425  | --       | 0,243    | 0,607  | 0,983    | 0,005 | 0,933 |
| Marquise  | 0,484   | 0,000  | 0,243    | --       | 0,999  | 0,020    | 0,000 | 0,008 |
| Merlin    | 0,849   | 0,002  | 0,607    | 0,999    | --     | 0,108    | 0,000 | 0,052 |
| Jantarol  | 0,887   | 0,945  | 0,983    | 0,020    | 0,108  | --       | 0,096 | 1     |
| Bukoz     | 0,001   | 0,725  | 0,005    | 0,000    | 0,000  | 0,096    | --    | 0,183 |
| R26       | 0,752   | 0,987  | 0,933    | 0,008    | 0,052  | 1        | 0,183 | --    |

F = 8,18

P = 0,00

Table S21. Post-hoc test for bolls number of the reference linseed varieties and R26 line in vegetation period 2019.

| Varieties | CJ 1016 | Altess | Festival | Marquise | Merlin | Jantarol | Bukoz | R26   |
|-----------|---------|--------|----------|----------|--------|----------|-------|-------|
| CJ 1016   |         | 0,000  | 0,004    | 0,000    | 0,006  | 0,073    | 0,999 | 1,000 |
| Altess    | 0,000   |        | 0,901    | 0,996    | 0,852  | 0,342    | 0,000 | 0,000 |
| Festival  | 0,004   | 0,901  |          | 1,000    | 1,000  | 1,000    | 0,162 | 0,122 |
| Marquise  | 0,000   | 0,996  | 1,000    |          | 1,000  | 0,993    | 0,033 | 0,023 |
| Merlin    | 0,006   | 0,852  | 1,000    | 1,000    |        | 1,000    | 0,210 | 0,162 |
| Jantarol  | 0,073   | 0,342  | 1,000    | 0,993    | 1,000  |          | 0,713 | 0,635 |
| Bukoz     | 0,999   | 0,000  | 0,162    | 0,033    | 0,210  | 0,713    |       | 1,000 |
| R26       | 1,000   | 0,000  | 0,122    | 0,023    | 0,162  | 0,635    | 1,000 |       |

F = 4,58

P = 0,00

Table S22. Post-hoc test for bolls number of the reference linseed varieties and R26 line in vegetation period 2020.

| Varieties | CJ 1016 | Altess | Festival | Marquise | Merlin | Jantarol | Bukoz | R26   |
|-----------|---------|--------|----------|----------|--------|----------|-------|-------|
| CJ 1016   | --      | 0,993  | 1        | 0,710    | 0,901  | 0,802    | 0,784 | 0,834 |
| Altess    | 0,993   | --     | 0,999    | 0,989    | 1      | 0,286    | 0,270 | 0,998 |
| Festival  | 1       | 0,999  | --       | 0,818    | 0,955  | 0,690    | 0,669 | 0,912 |
| Marquise  | 0,710   | 0,989  | 0,818    | --       | 1      | 0,032    | 0,029 | 1     |
| Merlin    | 0,901   | 1      | 0,955    | 1        | --     | 0,093    | 0,086 | 1     |
| Jantarol  | 0,802   | 0,286  | 0,690    | 0,032    | 0,093  | --       | 1     | 0,061 |
| Bukoz     | 0,784   | 0,270  | 0,669    | 0,029    | 0,086  | 1        | --    | 0,056 |
| R26       | 0,834   | 0,998  | 0,912    | 1        | 1      | 0,061    | 0,056 | --    |

F = 3,16

P = 0,005

Table S23. Welch test for total yield of the reference linseed varieties and R26 line in vegetation period 2019.

| Varieties | Mean  | N | Standard deviation | Min. | Max. | F Welch | p     |
|-----------|-------|---|--------------------|------|------|---------|-------|
| CJ 1016   | 49,33 | 3 | 4,51               | 45   | 54   | 2,60    | 0,010 |
| Altess    | 38,00 | 3 | 9,85               | 30   | 49   |         |       |
| Festival  | 41,00 | 3 | 7,21               | 33   | 47   |         |       |
| Marquise  | 37,67 | 3 | 3,21               | 34   | 40   |         |       |
| Merlin    | 33,33 | 3 | 2,52               | 31   | 36   |         |       |
| Jantarol  | 36,67 | 3 | 5,86               | 30   | 41   |         |       |
| Bukoz     | 48,67 | 3 | 7,37               | 43   | 57   |         |       |
| R26       | 43,00 | 3 | 3,00               | 40   | 46   |         |       |

The collected data do not allow to conclude that the compared varieties differ in average total yield.



Table S24. Welch test for total yield of the reference linseed varieties and R26 line in vegetation period 2020.

| Varieties | Mean  | N | Standard deviation | Min. | Max. | F Welch | p     |
|-----------|-------|---|--------------------|------|------|---------|-------|
| CJ 1016   | 78,33 | 3 | 10,10              | 67,5 | 87,5 | 0,82    | 0,588 |
| Altess    | 71,93 | 3 | 6,77               | 65,8 | 79,2 |         |       |
| Festival  | 78,87 | 3 | 10,73              | 70   | 90,8 |         |       |
| Marquise  | 62,23 | 3 | 20,40              | 41,7 | 82,5 |         |       |
| Merlin    | 61,93 | 3 | 8,36               | 54,2 | 70,8 |         |       |
| Jantarol  | 67,50 | 3 | 13,99              | 56,7 | 83,3 |         |       |
| Bukoz     | 70,00 | 3 | 10,42              | 60   | 80,8 |         |       |
| R26       | 66,10 | 3 | 14,04              | 50   | 75,8 |         |       |

The collected data do not allow to conclude that the compared varieties differ in average total yield.

Table S25. Welch test for straw yield of the reference linseed varieties and R26 line in vegetation period 2019.

| Varieties | Mean  | N | Standard deviation | Min. | Max. | F Welch | p     |
|-----------|-------|---|--------------------|------|------|---------|-------|
| CJ 1016   | 15,67 | 3 | 2,08               | 14   | 18   | 3,46    | 0,001 |
| Altess    | 17,67 | 3 | 2,52               | 15   | 20   |         |       |
| Festival  | 21,67 | 3 | 5,03               | 17   | 27   |         |       |
| Marquise  | 15,33 | 3 | 1,53               | 14   | 17   |         |       |
| Merlin    | 16,00 | 3 | 1,00               | 15   | 17   |         |       |
| Jantarol  | 16,67 | 3 | 2,52               | 14   | 19   |         |       |
| Bukoz     | 21,00 | 3 | 3,61               | 18   | 25   |         |       |
| R26       | 20,00 | 3 | 2,00               | 18   | 22   |         |       |

The collected data do not allow to conclude that the compared varieties differ in average total yield.

Table S26. Welch test for straw yield of the reference linseed varieties and R26 line in vegetation period 2020.

| Varieties | Mean  | N | Standard deviation | Min.  | Max.  | F Welch | p     |
|-----------|-------|---|--------------------|-------|-------|---------|-------|
| CJ 1016   | 40,83 | 3 | 8,78               | 32,50 | 50,00 | 1,22    | 0,348 |
| Altess    | 35,00 | 3 | 3,66               | 32,50 | 39,20 |         |       |
| Festival  | 43,33 | 3 | 5,83               | 39,20 | 50,00 |         |       |
| Marquise  | 30,57 | 3 | 10,84              | 19,20 | 40,80 |         |       |
| Merlin    | 33,33 | 3 | 4,15               | 29,20 | 37,50 |         |       |
| Jantarol  | 36,97 | 3 | 6,48               | 31,70 | 44,20 |         |       |
| Bukoz     | 42,23 | 3 | 5,71               | 35,80 | 46,70 |         |       |
| R26       | 41,97 | 3 | 10,40              | 31,70 | 52,50 |         |       |

The collected data do not allow to conclude that the compared varieties differ in average total yield.

Table S27. Post-hoc test for seed yield of the reference linseed varieties and R26 line in vegetation period 2019.

| Varieties | CJ 1016 | Altess | Festival | Marquise | Merlin | Jantarol | Bukoz | R26   |
|-----------|---------|--------|----------|----------|--------|----------|-------|-------|
| CJ 1016   |         | 0,001  | 0,001    | 0,210    | 0,000  | 0,018    | 0,142 | 0,066 |
| Altess    | 0,001   |        | 1,000    | 0,775    | 1,000  | 1,000    | 0,874 | 0,973 |
| Festival  | 0,001   | 1,000  |          | 0,542    | 1,000  | 0,990    | 0,672 | 0,869 |
| Marquise  | 0,210   | 0,775  | 0,542    |          | 0,286  | 0,999    | 1,000 | 1,000 |
| Merlin    | 0,000   | 1,000  | 1,000    | 0,286    |        | 0,906    | 0,393 | 0,620 |
| Jantarol  | 0,018   | 1,000  | 0,990    | 0,999    | 0,906  |          | 1,000 | 1,000 |
| Bukoz     | 0,142   | 0,874  | 0,672    | 1,000    | 0,393  | 1,000    |       | 1,000 |
| R26       | 0,066   | 0,973  | 0,869    | 1,000    | 0,620  | 1,000    | 1,000 |       |

F = 7,56

P = 0,001

Table S28. Welch test for seed yield of the reference linseed varieties and R26 line in vegetation period 2020.

| Varieties | Mean  | N | Standard deviation | Min.  | Max.  | F Welch | p     |
|-----------|-------|---|--------------------|-------|-------|---------|-------|
| CJ 1016   | 17,17 | 3 | 3,20               | 13,70 | 20,00 | 0,57    | 0,767 |
| Altess    | 19,27 | 3 | 1,65               | 17,60 | 20,90 |         |       |
| Festival  | 19,23 | 3 | 2,80               | 16,80 | 22,30 |         |       |
| Marquise  | 15,40 | 3 | 5,92               | 9,80  | 21,60 |         |       |
| Merlin    | 15,03 | 3 | 2,58               | 12,90 | 17,90 |         |       |
| Jantarol  | 17,77 | 3 | 5,40               | 14,50 | 24,00 |         |       |
| Bukoz     | 17,90 | 3 | 2,95               | 16,10 | 21,30 |         |       |
| R26       | 17,40 | 3 | 0,72               | 16,60 | 18,00 |         |       |

The collected data do not allow to conclude that the compared varieties differ in average total yield.
